# Supplementary material for: Multi-Response Optimization of the Malting Process of an Italian Landrace of Rye (Secale cereale L.) Using Response Surface Methodology and Desirability Function Coupled with Genetic Algorithm
Source: MDPI journal article supplement (doi:10.3390/foods11223561), 2022-11-09
Supplement: s1 [file s1]

**Table S1.** Comparison of model performance indices.

| Response           | Model                  | AIC <sup>1</sup> | BIC <sup>2</sup> | R<br>squared | Adjusted<br>R<br>squared | RMSE <sup>3</sup> | Sigma        | Performance<br>score |
|--------------------|------------------------|------------------|------------------|--------------|--------------------------|-------------------|--------------|----------------------|
| Extract            | FO <sup>6</sup>        | 45.923           | 50.089           | 0.564        | 0.463                    | 0.696             | 0.796        | 0.00%                |
|                    | TWI <sup>7</sup>       | 39.922           | 46.588           | 0.785        | 0.655                    | 0.489             | 0.638        | 27.48%               |
|                    | PQ <sup>8</sup>        | 11.246           | 20.411           | 0.972        | 0.936                    | 0.176             | 0.275        | 82.04%               |
|                    | <b>CM <sup>9</sup></b> | <b>10.747</b>    | <b>16.579</b>    | <b>0.956</b> | <b>0.937</b>             | <b>0.220</b>      | <b>0.273</b> | <b>97.97%</b>        |
| KI <sup>4</sup>    | FO                     | 94.356           | 98.522           | 0.730        | 0.667                    | 2.255             | 3.308        | 0.00000122%          |
|                    | TWI                    | 91.893           | 98.559           | 0.836        | 0.737                    | 2.255             | 2.940        | 19.63%               |
|                    | <b>PQ</b>              | <b>64.836</b>    | <b>74.001</b>    | <b>0.976</b> | <b>0.946</b>             | <b>0.853</b>      | <b>1.329</b> | <b>97.50%</b>        |
|                    | CM                     | 67.011           | 73.676           | 0.962        | 0.939                    | 1.085             | 1.414        | 84.93%               |
| AAL <sup>5</sup>   | FO                     | 49.119           | 53.285           | 0.065        | -0.151                   | 0.765             | 0.874        | 0.00%                |
|                    | TWI                    | 13.014           | 19.679           | 0.921        | 0.874                    | 0.222             | 0.289        | 67.41%               |
|                    | <b>PQ</b>              | <b>7.551</b>     | <b>16.716</b>    | <b>0.960</b> | <b>0.908</b>             | <b>0.158</b>      | <b>0.247</b> | <b>100.00%</b>       |
|                    | CM                     | 13.014           | 19.679           | 0.921        | 0.874                    | 0.222             | 0.289        | 67.41%               |
| Viscosity          | FO                     | 31.257           | 35.423           | 0.788        | 0.739                    | 0.452             | 0.517        | 0.000000289%         |
|                    | TWI                    | 30.213           | 36.878           | 0.860        | 0.776                    | 0.368             | 0.479        | 14.02%               |
|                    | PQ                     | -10.507          | -1.342           | 0.991        | 0.979                    | 0.093             | 0.145        | 79.75%               |
|                    | <b>CM</b>              | <b>-11.937</b>   | <b>-3.605</b>    | <b>0.991</b> | <b>0.981</b>             | <b>0.095</b>      | <b>0.138</b> | <b>99.90%</b>        |
| Viscosity<br>65 °C | FO                     | 24.538           | 28.705           | 0.827        | 0.787                    | 0.371             | 0.424        | 5.49%                |
|                    | TWI                    | 28.572           | 35.238           | 0.846        | 0.753                    | 0.350             | 0.457        | 3.86%                |
|                    | PQ                     | 7.522            | 16.687           | 0.969        | 0.928                    | 0.158             | 0.246        | 75.49%               |
|                    | <b>CM</b>              | <b>5.880</b>     | <b>13.379</b>    | <b>0.964</b> | <b>0.936</b>             | <b>0.169</b>      | <b>0.233</b> | <b>98.56%</b>        |

<sup>1</sup> AIC, Akaike information criterion; <sup>2</sup> BIC, Bayesian information criterion; <sup>3</sup> RMSE, Root Mean Square Error; <sup>4</sup> KI, Kolbach index; <sup>5</sup> AAL, apparent attenuation limit; <sup>6</sup> FO, first order; <sup>7</sup> TWI, two-way interaction; <sup>8</sup> PQ, pure quadratic; <sup>9</sup> CM, customized model (excluding some non-significant terms while maintaining hierarchy) The selected models have been reported in bold.

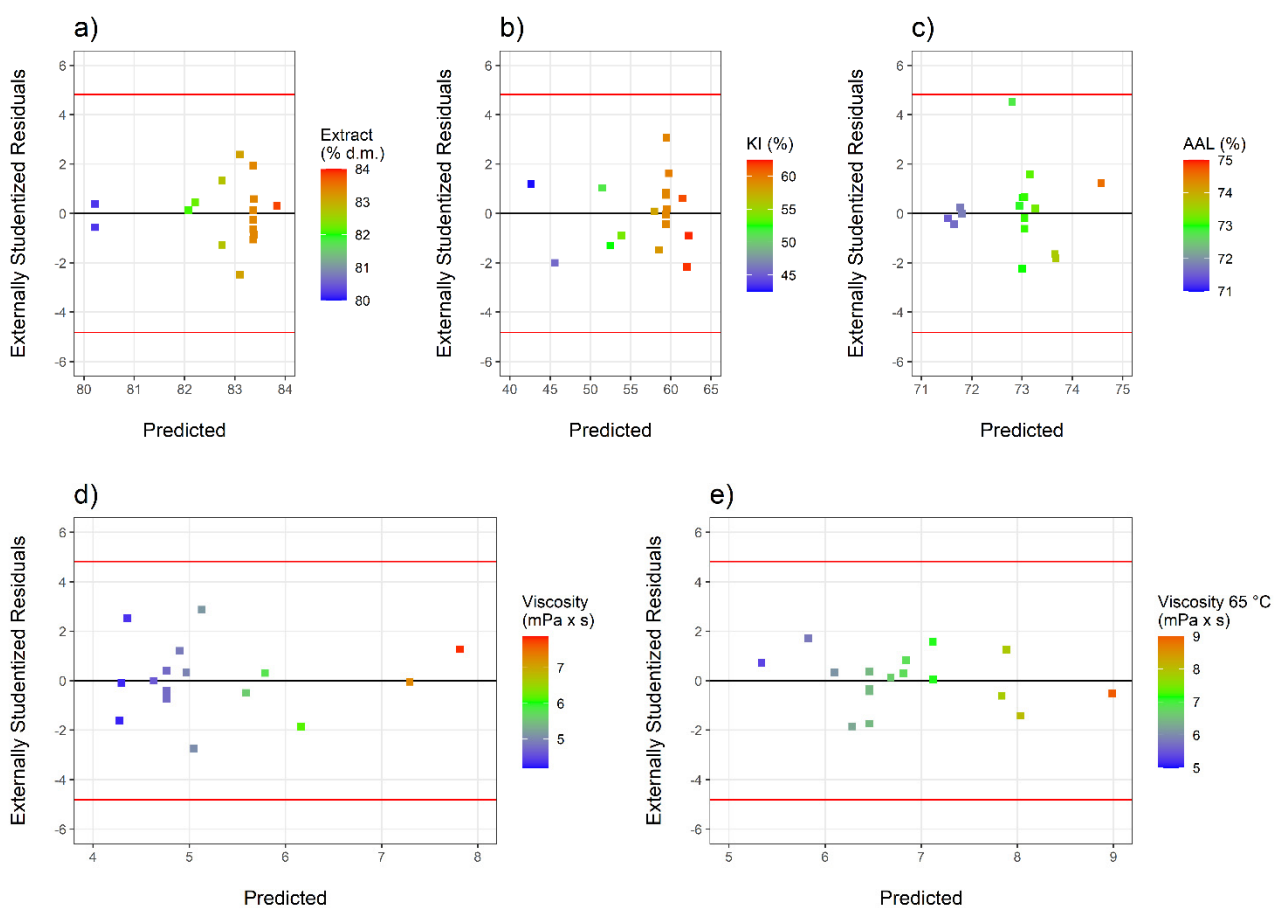

**Figure S1.** Plot of externally studentized residuals vs predicted responses. Each subplot refers to a specific quality attribute: a) extract; b) KI, Kolbach index; c) AAL, apparent attenuation limit; d) viscosity in the Congress wort; e) viscosity in the isothermal mash.

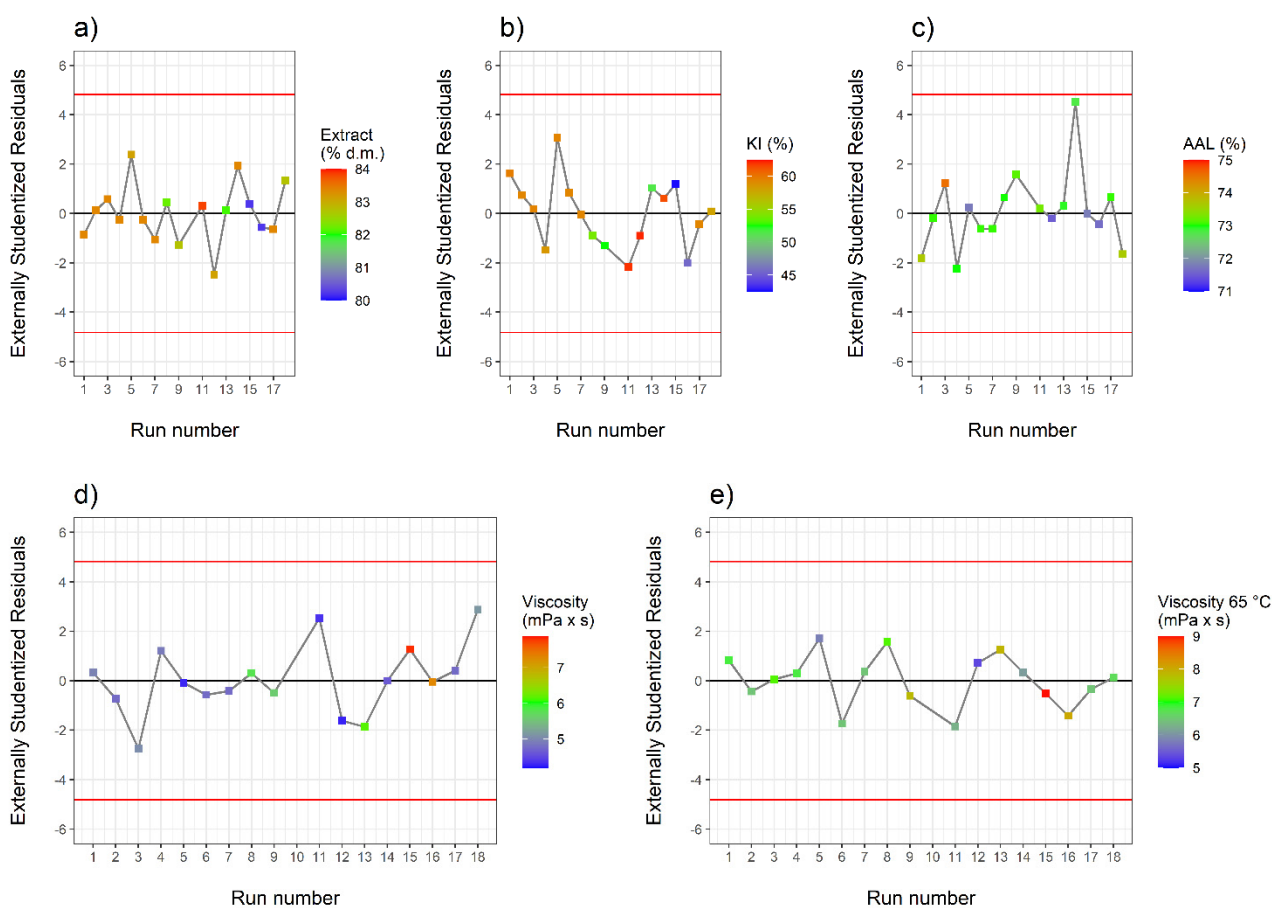

**Figure S2.** Plot of externally studentized residuals vs run number. Each subplot refers to a specific quality attribute: a) extract; b) KI, Kolbach index; c) AAL, apparent attenuation limit; d) viscosity in the Congress wort; e) viscosity in the isothermal mash.

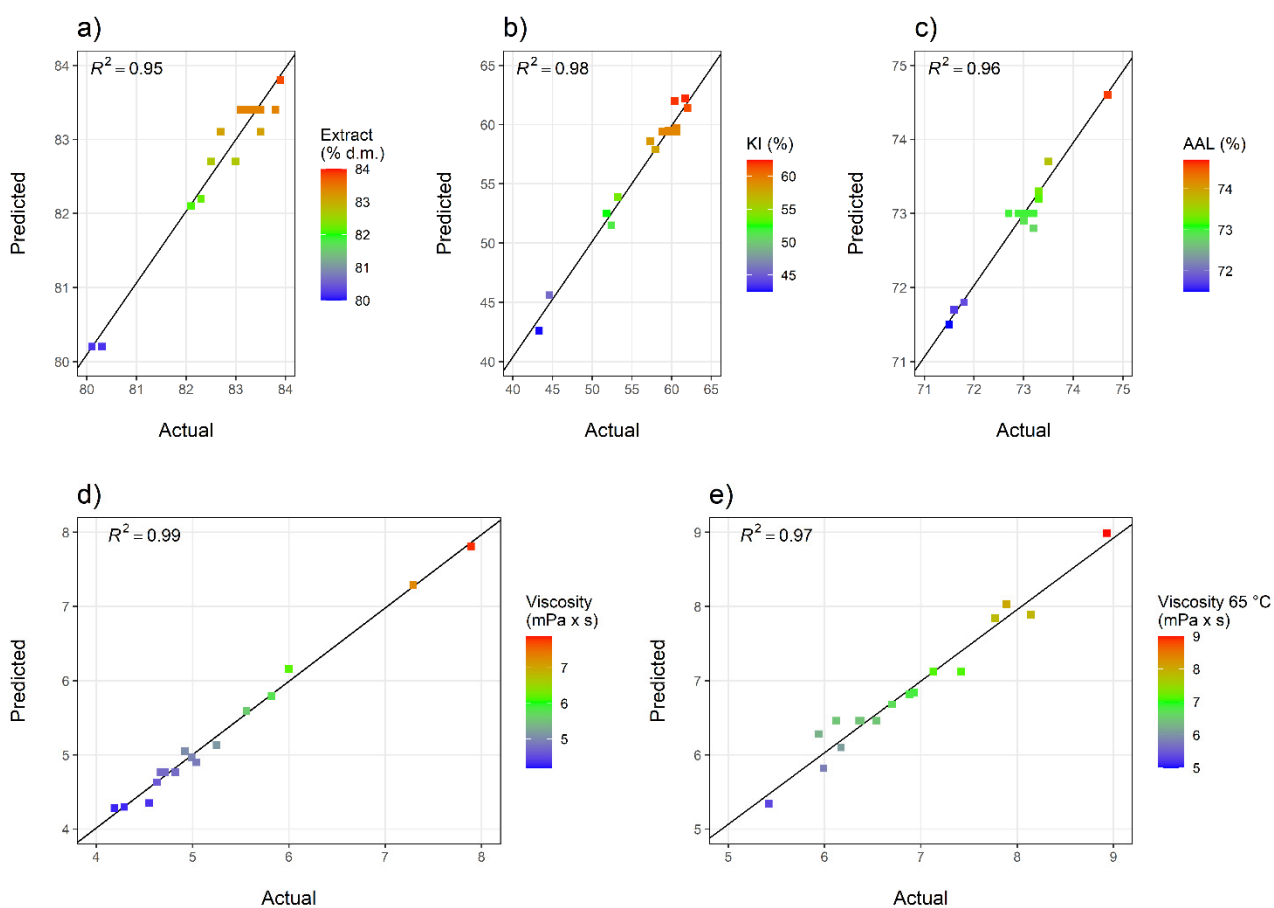

**Figure S3.** Plot of predicted vs actual responses. Each subplot refers to a specific quality attribute: a) extract; b) KI, Kolbach index; c) AAL, apparent attenuation limit; d) viscosity in the Congress wort; e) viscosity in the isothermal mash.
